# Supplementary material
Source: PubMed Central journal article supplement (PMC3534191)
Supplement: supp_bgs313_Supplemental_Material.pdf [file supp_bgs313_Supplemental_Material.pdf]

**Supplemental Table 1 Primers List**

| <b>QPCR Primer</b>              | <b>Sequence (5'-3')</b>           |
|---------------------------------|-----------------------------------|
| $\beta$ -actin F                | TATTGGCAACGAGCGGTTCC              |
| $\beta$ -actin R                | GGCATAGAGGTCTTTACGGATGT           |
| COX2 F                          | GGCGCAGTTTATGTTGTCTGT             |
| COX2 R                          | CAAGACAGATCATAAGCGAGGA            |
| IL-6 F                          | ACCAGAGGAAATTTTCAATAGGC           |
| IL-6 R                          | TGATGCACTTGCAGAAAACA              |
| IL-1 $\beta$ F                  | AAGAGCTTCAGGCAGGCAGTATCA          |
| IL-1 $\beta$ R                  | TGCAGCTGTCTAGGAACGTCA             |
| Ido1 F                          | GTGGGCAGCTTTTCAACTTC              |
| Ido1 R                          | GGGCTTTGCTCTACCACATC              |
| mPGES-1 F                       | ATGAGTACACGAAGCCGAGG              |
| mPGES-1 R                       | CCAGTATTACAGGAGTGACCCAG           |
| <b>ChIP-qPCR Primer</b>         | <b>Sequence (5'-3')</b>           |
| COX2 F                          | GCCGCTGCGGTTCTTG                  |
| COX2 R                          | CCAACCCCCACCAACTTTT               |
| mPGES-1 F                       | GGCCACACATTAGCATAAATGC            |
| mPGES-1 R                       | ACTGACCCATGCCACCTT                |
| <b>Cloning Primer</b>           | <b>Sequence (5'-3')</b>           |
| mPGES-1 -668/+23 F              | ACCAACGCGTGGCAGAACAAAACCATCATCAGC |
| mPGES-1 -300/+23 F              | ACCAACGCGTGGTTCTCACGCTCTTTCGGAAG  |
| mPGES-1 R                       | CCGCTCGAGCGGGAGTGAGACTGTC         |
| mPGES-1 -300/+23 $\Delta$ HRE F | CTGAGCCAAGGATGGGGACACCTCCATTCC    |
| mPGES-1 -300/+23 $\Delta$ HRE R | GGAATGGAGGTGTCCCCATCCTTGGCTCAG    |

## Supplemental Figure 1

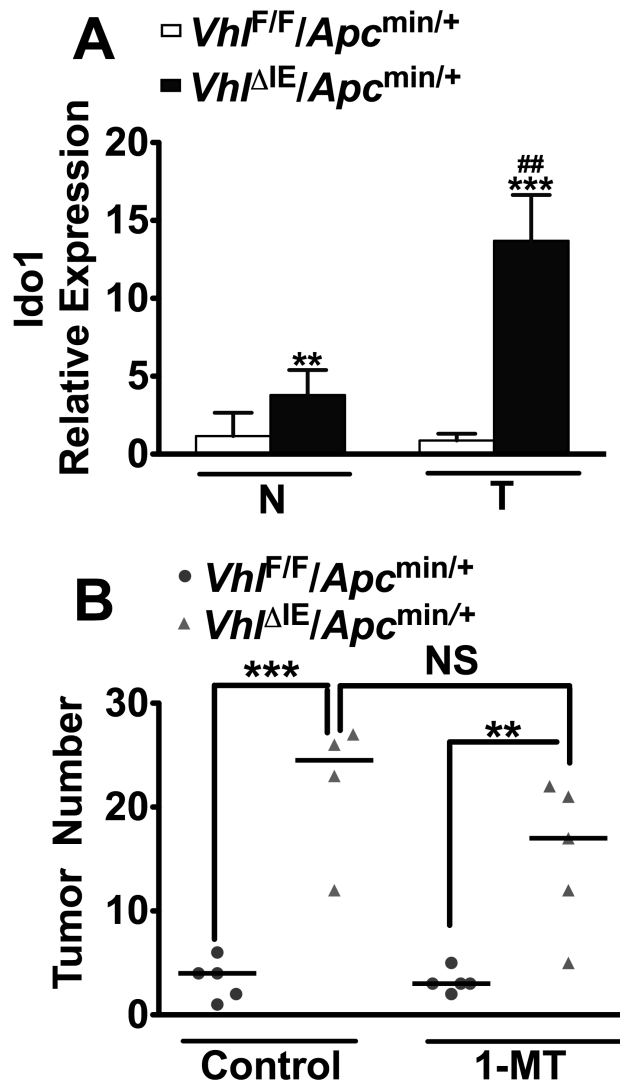

**Supplemental Figure 1 Ido1 is not involved in HIF-2 $\alpha$ -mediated intestinal tumorigenesis.** (A) qPCR analysis of Ido1 in normal and tumor colon tissues from  $Vhl^{F/F}/Apc^{min/+}$  and  $Vhl^{\Delta IE}/Apc^{min/+}$  mice. Each bar represents the mean value  $\pm$  S.D. (n=4). Expression was normalized to  $\beta$ -actin. N, normal tissue; T, tumor tissue; \*\*p<0.01, \*\*\*p<0.001 versus  $Vhl^{F/F}/Apc^{min/+}$  mice; ###p<0.01 versus normal tissue. (B) Tumor numbers in the colon from  $Vhl^{F/F}/Apc^{min/+}$  (n=10), and  $Vhl^{\Delta IE}/Apc^{min/+}$  mice (n=9) treated with control or 1-MT for 2 months. \*\*p < 0.01, \*\*\*p < 0.001; NS, not significant.
